# Supplementary material for: Development of non-viral, ligand-dependent, EPHB4-specific chimeric antigen receptor T cells for treatment of rhabdomyosarcoma
Source: PubMed Central journal article supplement (PMC7985479; doi:10.1016/j.omto.2021.03.001), 2021-03-05
Supplement: mmc1.pdf [file mmc1.pdf]

**OMTO, Volume 20**

**Supplemental information**

**Development of non-viral, ligand-dependent,**

**EPHB4-specific chimeric antigen receptor**

**T cells for treatment of rhabdomyosarcoma**

**Hiroshi Kubo, Shigeki Yagyu, Kayoko Nakamura, Kumiko Yamashima, Akimasa Tomida, Ken Kikuchi, Tomoko Iehara, Yozo Nakazawa, and Hajime Hosoi**

# Figure S1. Kubo H et al.

**A.**

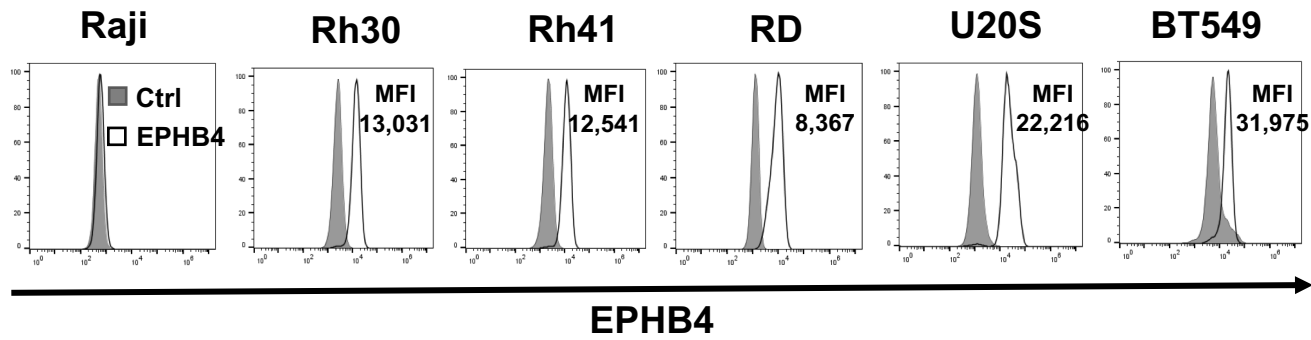

**B.**

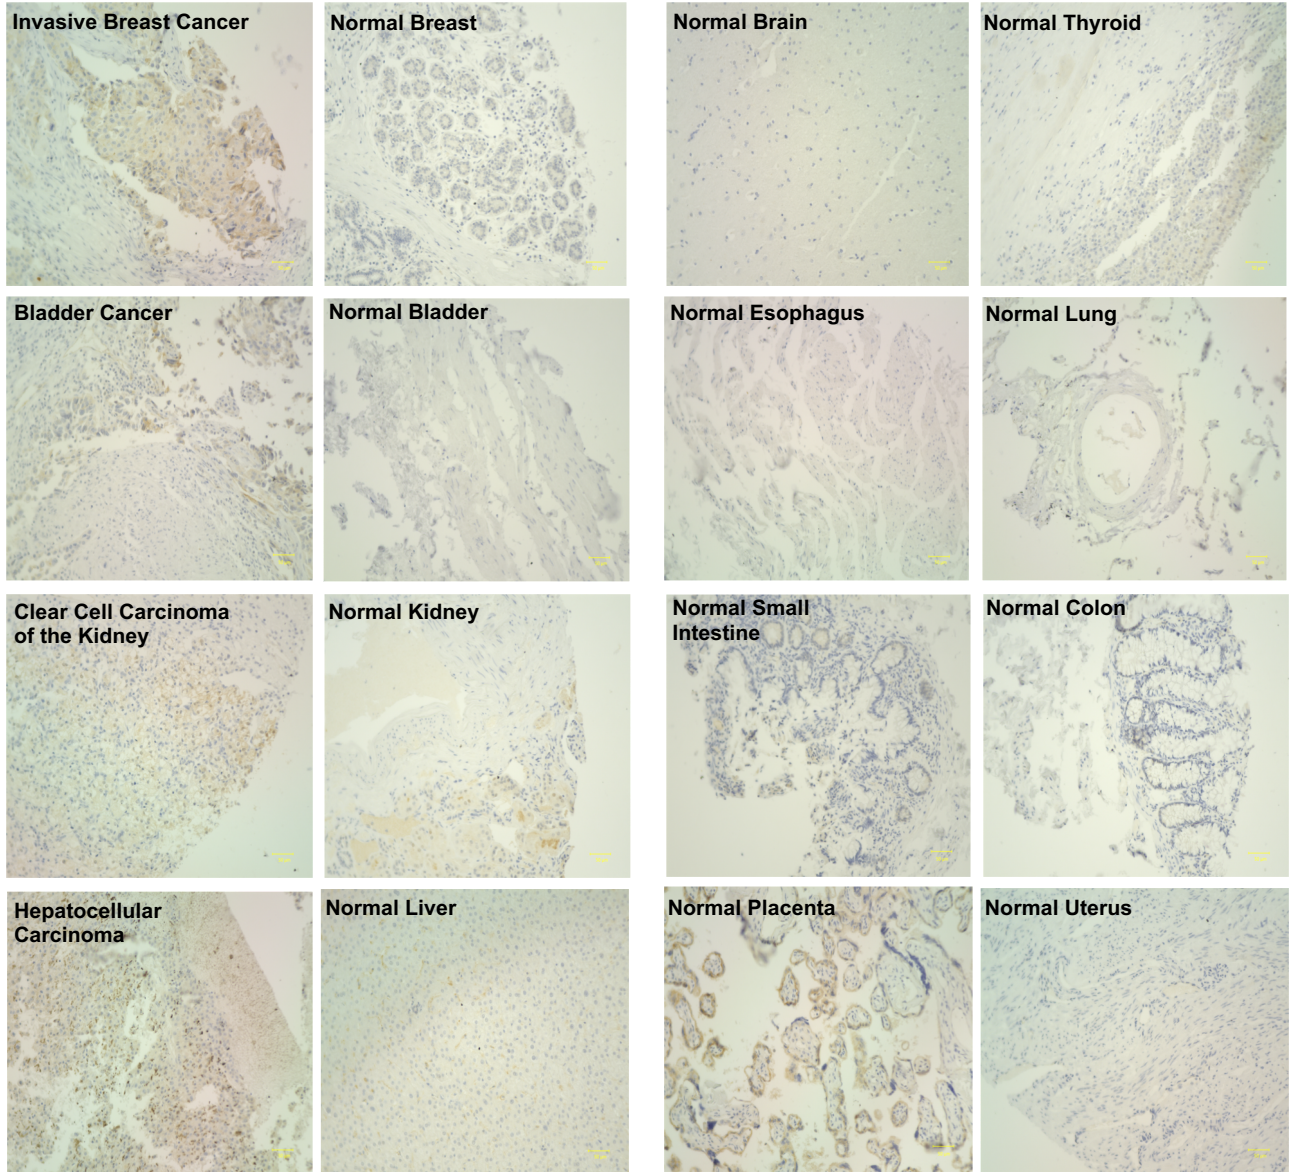

**Figure S1**

**A.** EPHB4 expressed in rhabdomyosarcoma (RMS) (Rh30, Rh41, RD), osteosarcoma (U2OS), and breast cancer (BT549) cell lines. EPHB4 was barely expressed in the lymphoblastoid cell line (Raji) (negative control). **B.** EPHB4 expression in tumor tissue and normal tissue examined via immunohistochemistry. Scale bar: 50  $\mu$ m.

# Figure S2. Kubo H et al.

A.

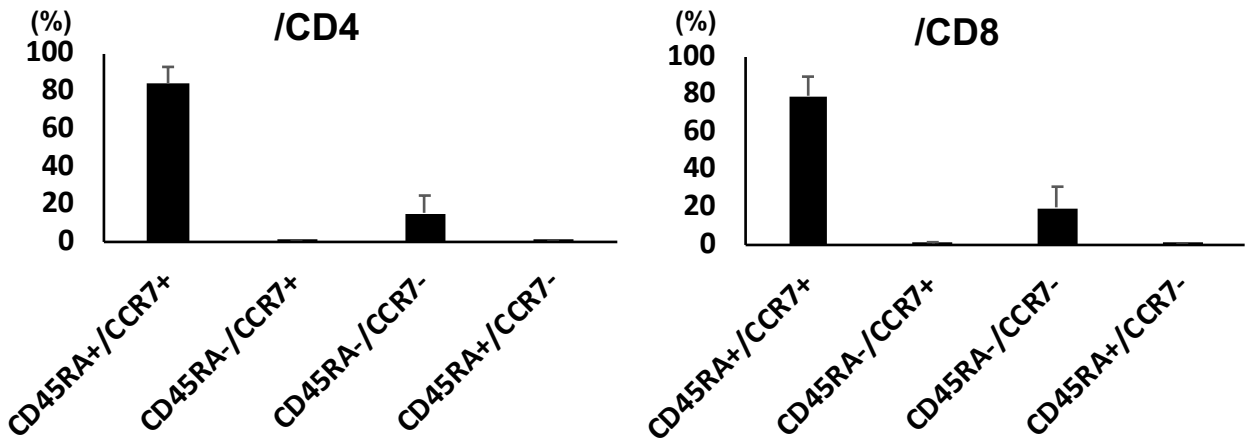

B.

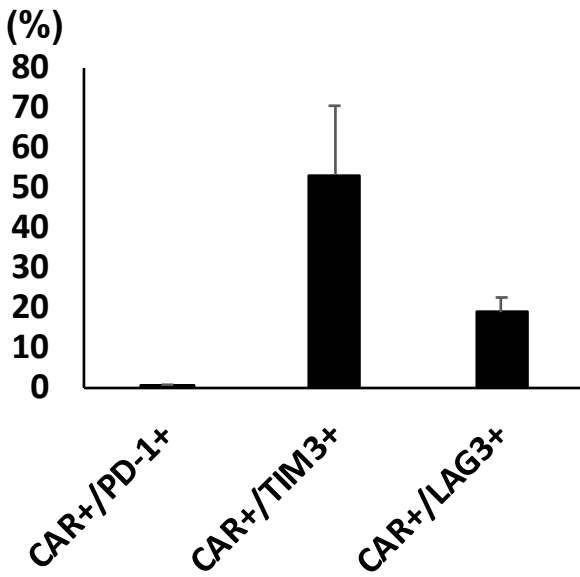

**Figure S2**

**A.** The phenotypes on EPHB4-CAR-T cells in CD4 positive (left) and CD8 positive (right) subpopulation were assessed via flow cytometry. **B.** The exhaustion markers on CAR positive of EPHB4-CAR-T cells. Data are represented by the means  $\pm$  SD (N = 5).

# Figure S3. Kubo H et al.

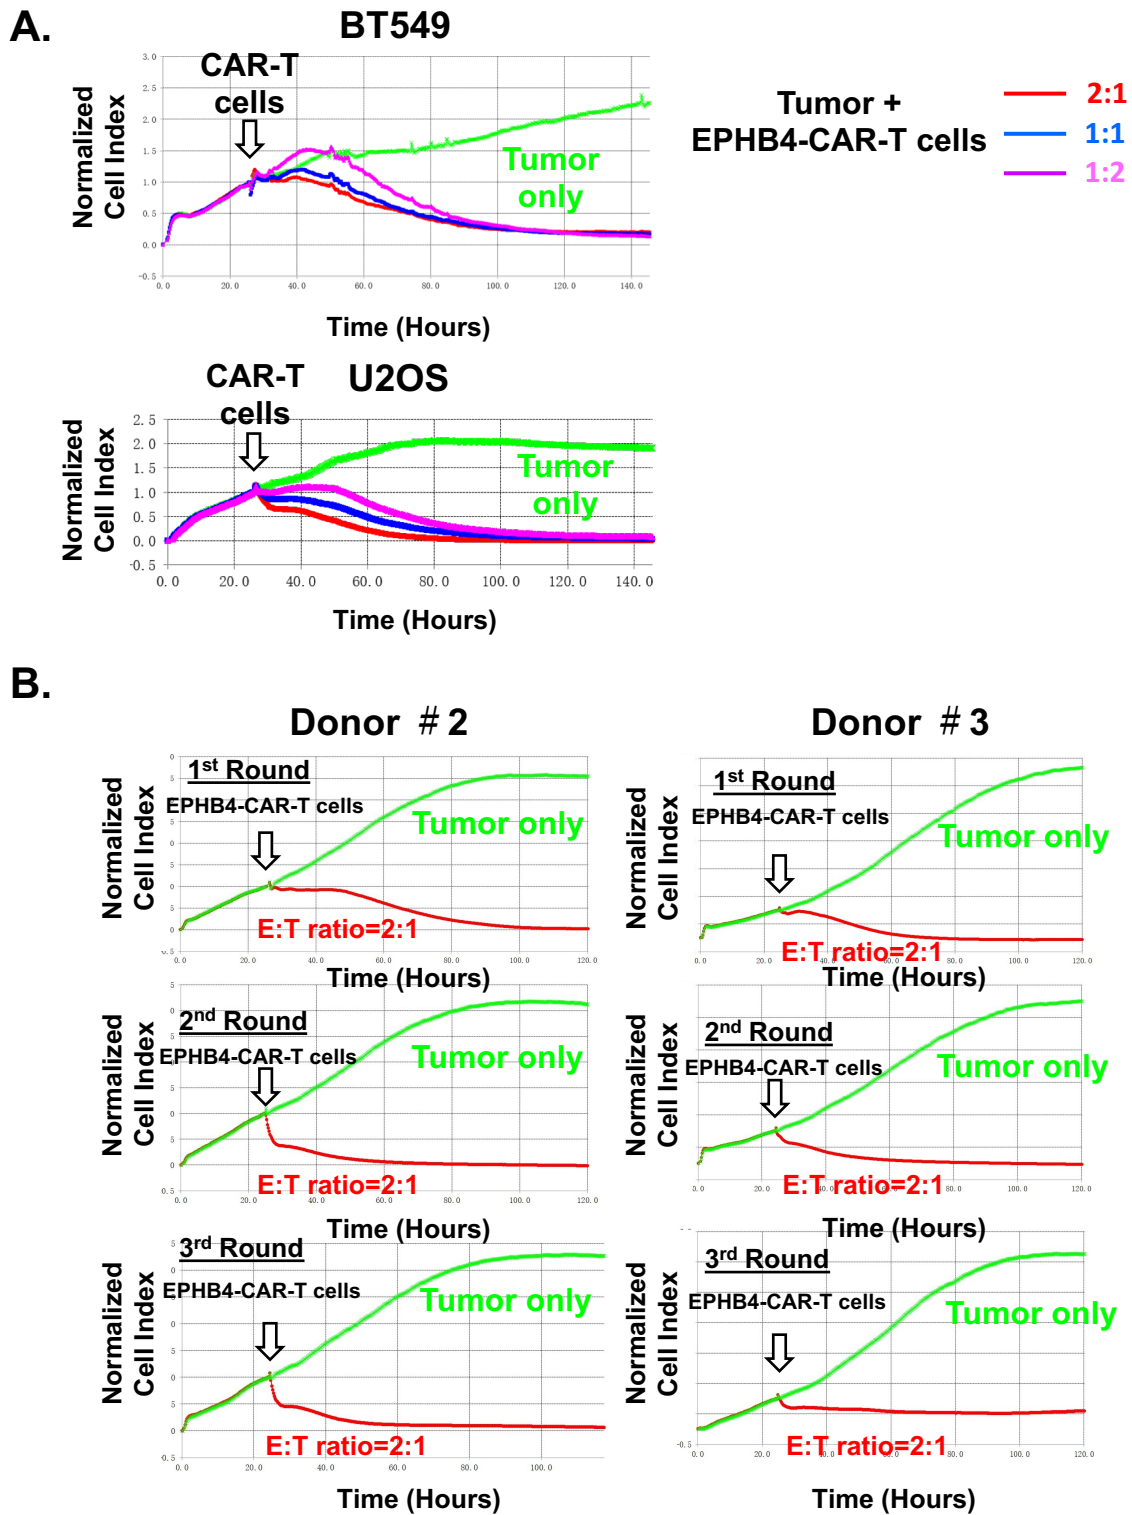

**Figure S3**

**A.** BT549 and U2OS were co-cultured with EPHB4-CAR-T cells at E:T ratios of 2:2, 1:1, and 1:2. **B.** Serial tumor challenge assay in another two donors (Donor#2, Donor#3) in addition to the data shown in Figure 2B.

# Figure S4. Kubo H et al.

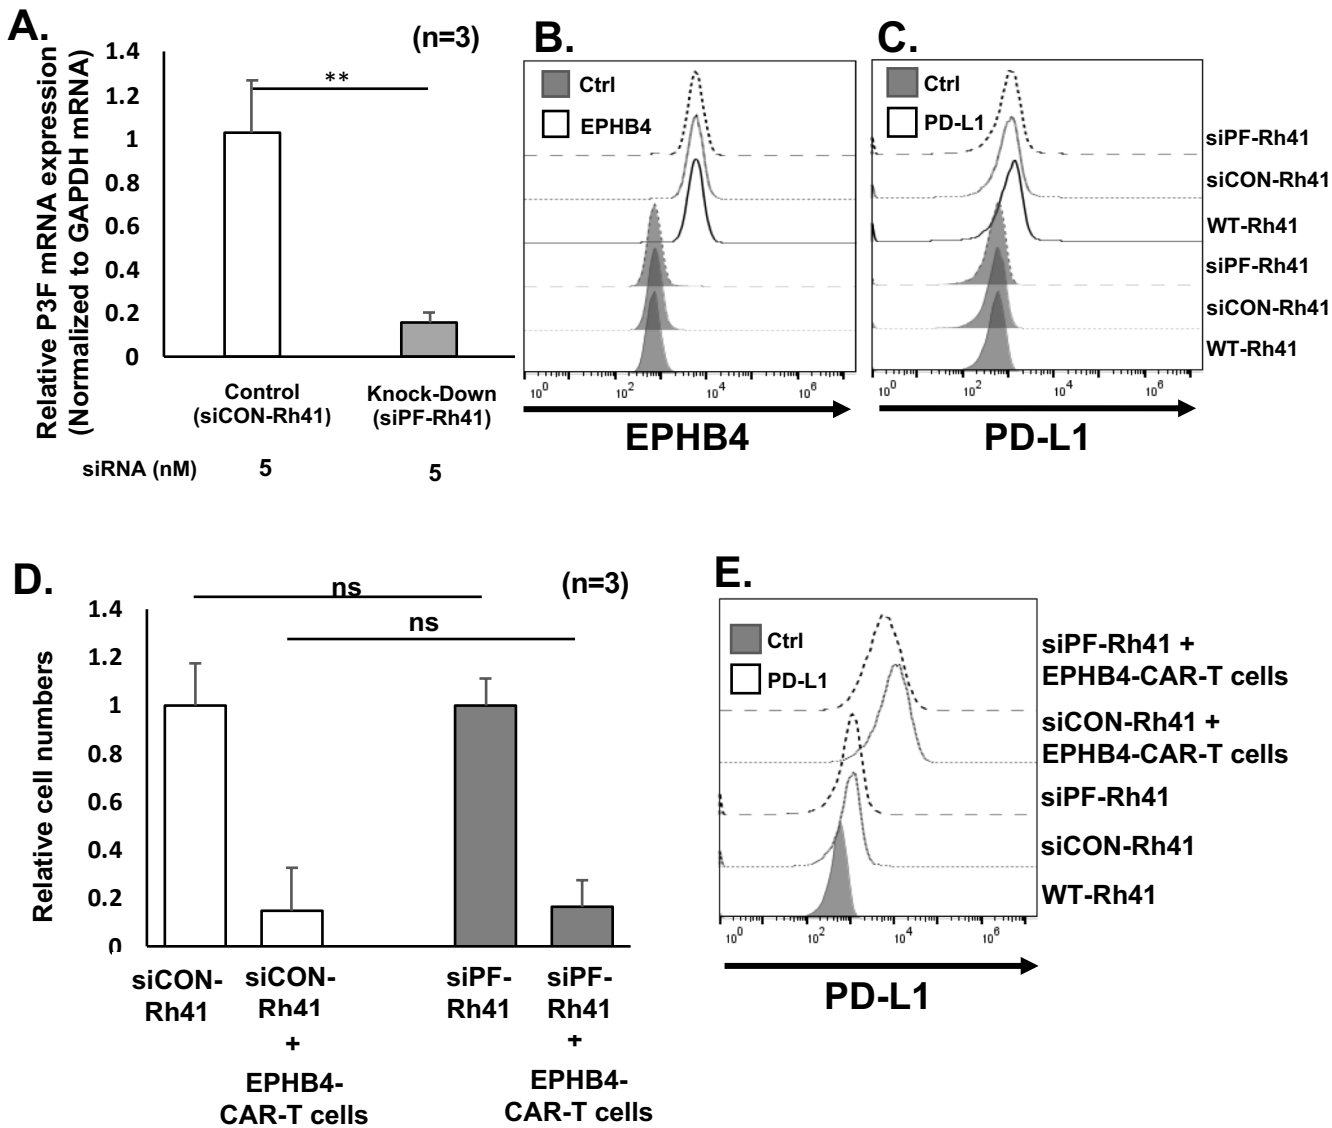

## Figure S4

In relation to Figure 3, we have validated the data using another translocation positive RMS cell line, Rh41. **A.** After transfection with siRNAs against P3F (siPF) into P3F-positive Rh41 cells for 24 h, the knocked-down efficacy of siPF against P3F was assessed by quantitative reverse-transcription polymerase chain reaction (qRT-PCR). \*\* =  $P < 0.01$ . **B.** P3F did not affect EPHB4 and **C.** PD-L1 assessed by flow cytometry. **D.** A comparison of the antitumor effect in siCON-Rh41 and siPF-Rh41 assessed by flow cytometry. The antitumor effect of the EPHB4-CAR-T cells on Rh41 cells was evaluated according to the ratio of survival of Rh41 cells alone to the survival of Rh41 cells cocultured with EPHB4-CAR-T cells. Mean  $\pm$  SD from 3 different experiments are shown; ns = not significant **E.** PD-L1 expression between siCON-Rh41 and siPF-Rh41 treated with EPHB4-CAR-T cells was evaluated via flow cytometry.

# Figure S5. Kubo H et al.

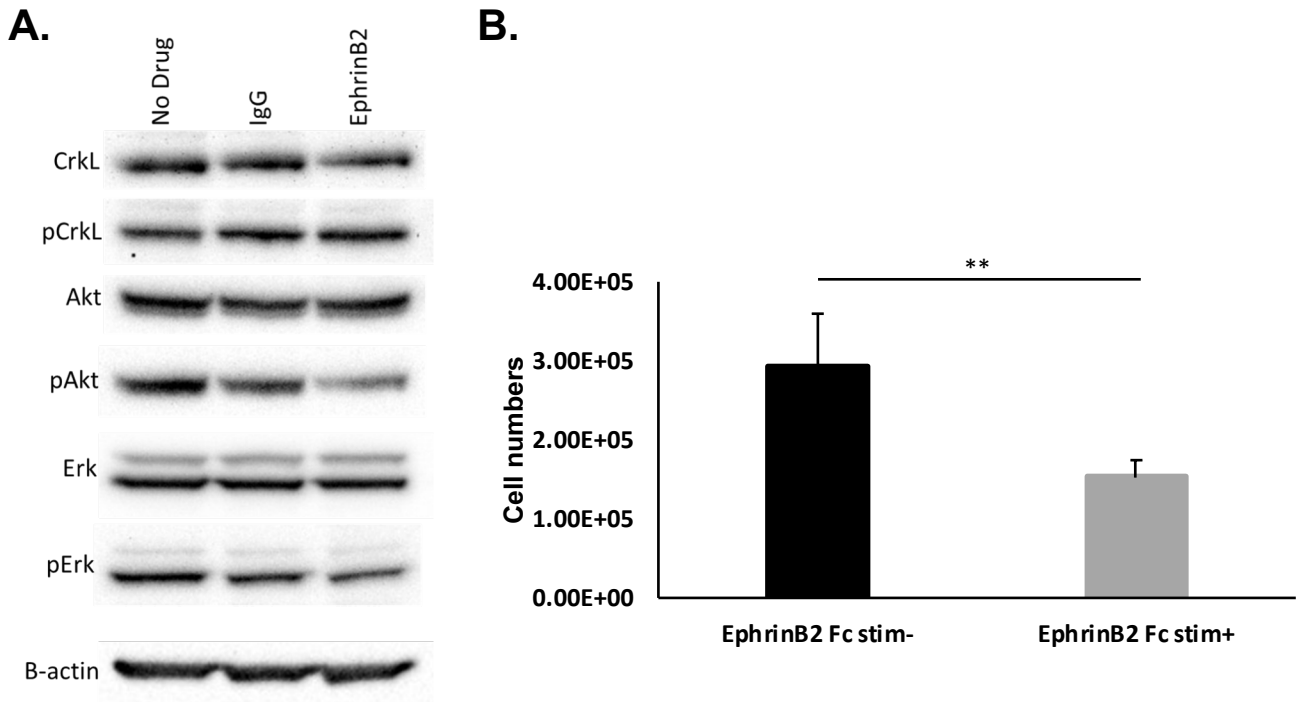

## Figure S5

**A.** Protein expression levels of Crkl, phospho-Crkl (pCrkl), Akt, phospho-Akt (pAkt), Erk1/2, and phospho-Erk1/2 (pErk) were determined via western blot analysis using  $\beta$ -actin as a control. Rh30 cells were cultured with 2  $\mu$ g/mL clustered human recombinant EPHRIN B2-Fc or human IgG for 15 min. **B.** Rh30 cells cultured on EphrinB2-Fc coated plate for 72 h and the number of live tumor cells were measured via flow cytometry; \*\* =  $P < 0.01$

# Figure S6. Kubo H et al.

**A.**

EPHB4\_HUMAN LEETLLNTKLETADLKWVTFPQVDGQWEELSGLDEEQHSVRTYEVCDDVQRAPGQAHWLRTE  
EPHB4\_MOUSE LEETLLNTKLETADLKWVTYPQAEQGQWEELSGLDEEQHSVRTYEVCDDMKRPGGQAHWLRTE

EPHB4\_HUMAN GWVPRRGAVHVYATLRFTMLECLSLPRAGRSCKETFTTVFYYESDADTATALTPAWMENPY  
EPHB4\_MOUSE GWVPRRGAVHVYATIRFTMMECLSLPRASRSCKETFTTVFYYESEADTATAHTPAWMENPY

EPHB4\_HUMAN IKVDTVAAEHLTRKRPGAEATGKVNKTLRLGPLSKAGFYLAFAQDQGACMALLSLHLFYK  
EPHB4\_MOUSE IKVDTVAAEHLTRKRPGAEATGKVNKTLRLGPLSKAGFYLAFAQDQGACMALLSLHLFYK

EPHB4\_HUMAN KCAQLTVNLTFRFPETVPRELVVPVAGSCVVDVAVPAPGPSPLYCREDGQWAEQPVGTGCSC  
EPHB4\_MOUSE KCSWLITNLTFRFPETVPRELVVPVAGSCVANAVPTANPSPSLYCREDGQWAEQQVGTGCSC

EPHB4\_HUMAN APGFEEAEGNTKCRACAQGTFFKPLSGEGSCQPCPANSHTNIGSAVQCQCRVGYFRARTDP  
EPHB4\_MOUSE APGYEAAESNKVCRACGQGTFFKQIGDESCLPCPANSHTNIGSPVCLCRIGYRARS DP

EPHB4\_HUMAN RGAPCTTPPSAPRSVVSRNLNGSSLHLEWSAPLES GGREDLTYALRCRECRPGGSCAPCGG  
EPHB4\_MOUSE RSSPCTTPPSAPRSVVHHLNGSSLRLLEWSAPLES GGREDLTYAVRCRECRPGGSCCLPCGG

EPHB4\_HUMAN DLTDFDGPGRDLVEPWVVRGLRDPFTYTFEVTALNGVSLATGPPVPEPVNVTTDREVPP  
EPHB4\_MOUSE DMTDFDGPGRDLVEPWAIRGLRDPVYTFEVAALNGVSLATGPPVPEPVNVTTDREVPP

EPHB4\_HUMAN AVSDIRVTRSSPSSLSLAWAVPRAPSGAVLDYEVKYHEKGAEGPSSVRFLKTSENRAELR  
EPHB4\_MOUSE AVSDIRVTRSSPSSLILSWAIPRAPSGAVLDYEVKYHEKGAEGPSSVRFLKTSENRAELR

EPHB4\_HUMAN GLKRGASYLVQVRARSEAGYGPFQGEHHSQTQLDESEGWREQLA  
EPHB4\_MOUSE GLKRGASYLVQVRARSEAGYGPFQGEHHSQTQLDESESWREQLA

**B.**

EFNB2\_HUMAN IVLEPIYWNSNSKFLPGQGLVLYPQIGDKLDIICPKVDSKTVGQY EYKVMVDKDQAD  
EFNB2\_MOUSE IVLEPIYWNSNSKFLPGQGLVLYPQIGDKLDIICPKVDSKTVGQY EYKVMVDKDQAD

EFNB2\_HUMAN RCTIKKENTPLLNCAPDQDIKFTIKFQEFSPNLWGLEFQKNKDYYIISTSNGLLEGLDN  
EFNB2\_MOUSE RCTIKKENTPLLNCARPQDVKFTIKFQEFSPNLWGLEFQKNKDYYIISTSNGLLEGLDN

EFNB2\_HUMAN QEGGVCQTRAMKILMKVGQDASSAGSTRNKDPTRRPELEAGTNGRSSTTSPFVKPNPGSS  
EFNB2\_MOUSE QEGGVCQTRAMKILMKVGQDASSAGSARNHGPTRRPELEAGTNGRSSTTSPFVKPNPGSS

EFNB2\_HUMAN TDGNSAGHSNNILGSEVALFA  
EFNB2\_MOUSE TDGNSAGHSNNLLGSEVALFA

## Figure S6

**A.** The amino acid sequences of human and murine EPHB4 receptor regions contain a conserved 186-amino-acid N-terminal ligand-binding domain (EPH LBD, highlighted in green). **B.** The amino acid sequences of human and mouse EPHRIN B2 (EFNB2) regions contain a conserved 137-amino-acid N-terminal receptor-binding domain (Ephrin RBD, highlighted in magenta)

# Figure S7. Kubo H et al.

## Antigen presenting feeder plasmid

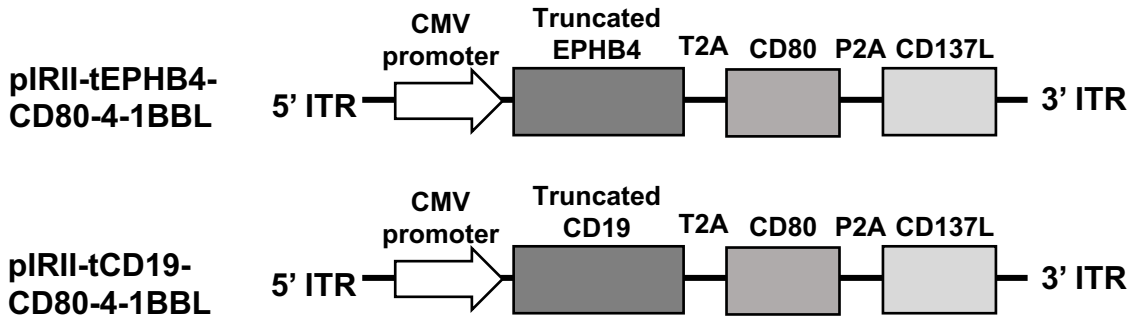

**Figure S7**

Schematic of antigen presenting feeder plasmid for EPHB4-CAR and of CD19-CAR.



### Supplemental Table 1

siRNA and primer sequences

| siRNA name |    | Sequence 5' to 3'     |
|------------|----|-----------------------|
| siPF       | s  | CCUCUCACCUCAGAAUUCATT |
| siPF       | as | UGAAUUCUGAGGUGAGAGGTT |
| siCON      | s  | CUACUAUACCGAUACUCCCTT |
| siCON      | as | GGGAGUAUCGGUAUAGUAGTT |

### Supplemental Table 2

Forward and reverse primer sequences

| Target gene |   | Sequence 5' to 3'     |
|-------------|---|-----------------------|
| PAX3-FOXO1  | F | TCCAACCCCATGAACCCC    |
|             | R | GCCATTTGGAAACTGTGATCC |
| GAPDH       | F | GCACCGTCAAGGCTGAGAAC  |
|             | R | ATGGTGGTGAAGACGCCAGT  |
